# Supplementary material for: Decreased Salinity Offsets the Stimulation of Elevated pCO2 on Photosynthesis and Synergistically Inhibits the Growth of Juvenile Sporophyte of Saccharina japonica (Laminariaceae, Phaeophyta)
Source: MDPI journal article supplement (doi:10.3390/plants11212978), 2022-11-04
Supplement: s1 [file s1]

## Supplementary data for the article:

### Decreased salinity offsets the stimulation of elevated pCO<sub>2</sub> on photosynthesis and synergistically inhibits the growth of juvenile sporophyte of *Saccharina japonica* (Laminariaceae, Phaeophyta)

**Table S1.** Two-way ANOVA analyses for the interactive effect of pCO<sub>2</sub> and salinity on growth, photosynthetic parameters, pigments and soluble carbohydrate contents in *S. japonica* at day 4.

| Factors                            | df | F       | P     | Partial $\eta^2$ |
|------------------------------------|----|---------|-------|------------------|
| <b>RGR</b>                         |    |         |       |                  |
| Salinity                           | 2  | 122.542 | 0.000 | 0.953            |
| pCO <sub>2</sub>                   | 1  | 42.147  | 0.000 | 0.778            |
| Salinity $\times$ pCO <sub>2</sub> | 2  | 0.247   | 0.785 | 0.040            |
| <b>Chl <i>a</i></b>                |    |         |       |                  |
| Salinity                           | 2  | 8.029   | 0.006 | 0.572            |
| pCO <sub>2</sub>                   | 1  | 16.845  | 0.001 | 0.584            |
| Salinity $\times$ pCO <sub>2</sub> | 2  | 1.413   | 0.218 | 0.191            |
| <b>Cartenoid</b>                   |    |         |       |                  |
| Salinity                           | 2  | 11.686  | 0.002 | 0.661            |
| pCO <sub>2</sub>                   | 1  | 17.752  | 0.001 | 0.597            |
| Salinity $\times$ pCO <sub>2</sub> | 2  | 3.911   | 0.049 | 0.395            |
| <b>F<sub>v</sub>/F<sub>m</sub></b> |    |         |       |                  |
| Salinity                           | 2  | 20.141  | 0.000 | 0.573            |
| pCO <sub>2</sub>                   | 1  | 3.024   | 0.092 | 0.092            |
| Salinity $\times$ pCO <sub>2</sub> | 2  | 0.259   | 0.774 | 0.017            |
| <b>rETR<sub>max</sub></b>          |    |         |       |                  |
| Salinity                           | 2  | 1.990   | 0.154 | 0.117            |
| pCO <sub>2</sub>                   | 1  | 14.479  | 0.001 | 0.326            |
| Salinity $\times$ pCO <sub>2</sub> | 2  | 7.236   | 0.003 | 0.325            |
| <b>E<sub>k</sub></b>               |    |         |       |                  |
| Salinity                           | 2  | 3.168   | 0.056 | 0.174            |
| pCO <sub>2</sub>                   | 1  | 6.703   | 0.015 | 0.183            |
| Salinity $\times$ pCO <sub>2</sub> | 2  | 3.904   | 0.031 | 0.207            |
| <b><math>\alpha</math></b>         |    |         |       |                  |
| Salinity                           | 2  | 6.006   | 0.006 | 0.286            |
| pCO <sub>2</sub>                   | 1  | 0.004   | 0.950 | 0.000            |
| Salinity $\times$ pCO <sub>2</sub> | 2  | 4.714   | 0.017 | 0.239            |
| <b>NPQ</b>                         |    |         |       |                  |
| Salinity                           | 2  | 0.581   | 0.566 | 0.041            |
| pCO <sub>2</sub>                   | 1  | 1.350   | 0.255 | 0.048            |
| Salinity $\times$ pCO <sub>2</sub> | 2  | 4.782   | 0.017 | 0.262            |
| <b>Soluble carbohydrates</b>       |    |         |       |                  |
| Salinity                           | 2  | 48.210  | 0.000 | 0.889            |
| pCO <sub>2</sub>                   | 1  | 29.893  | 0.000 | 0.714            |
| Salinity $\times$ pCO <sub>2</sub> | 2  | 7.651   | 0.007 | 0.560            |
